# Supplementary material for: Spatial variability in mass change of glaciers in the Everest region, central Himalaya, between 2000 and 2015
Source: Copernicus journal article supplement (doi:10.5194/tc-2016-99), 2016-05-23
Supplement: Supplementary file 1 [file tc-2016-99-supplement.pdf]

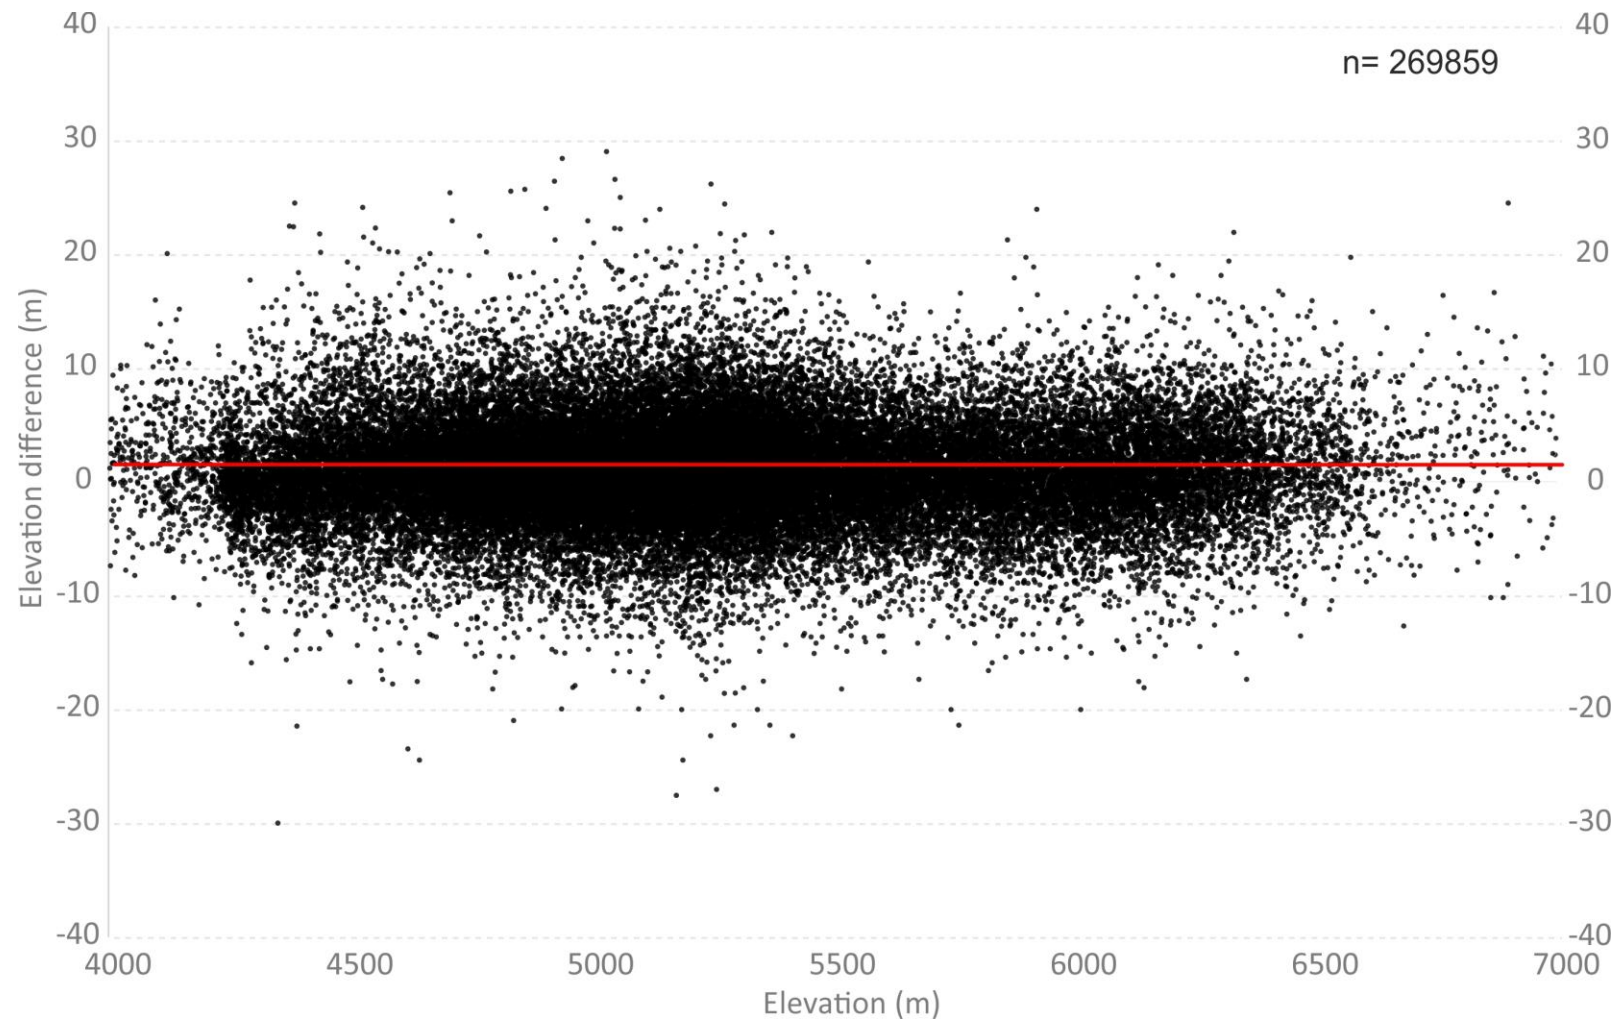

Supplementary figure 1. Stable ground elevation difference versus elevation across the study area. The difference grid was resampled to 100 m pixel size.
